# Supplementary material
Source: Springer Nature journal article supplement (https://www.springermedizin.de/resource/supplementary/13058_2011_2936_MOESM3_ESM.pdf/9702920)

**(A)****U2OS-ER $\alpha$  TCL1A knockdown**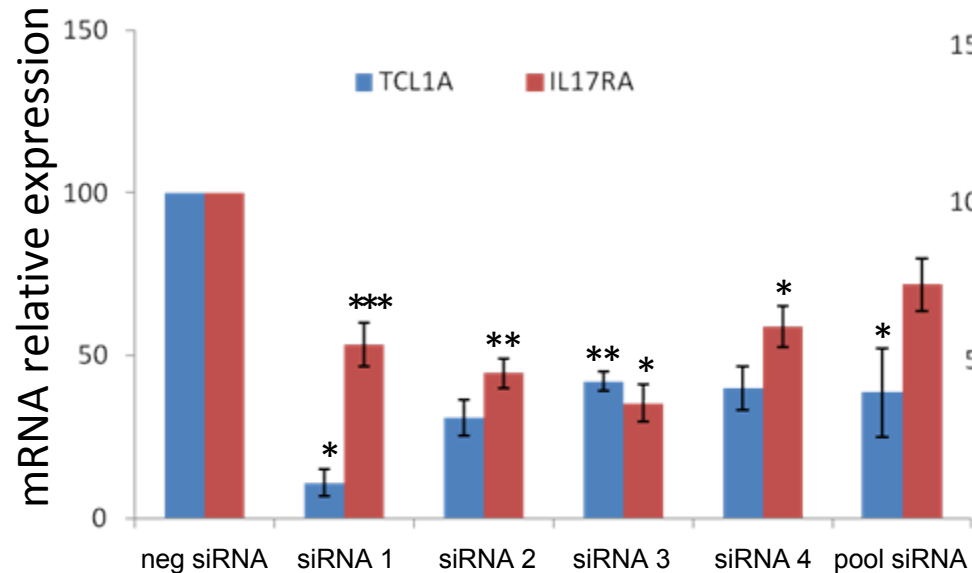**(B)****U2OS-ER $\alpha$  TCL1A knockdown + 0.1 nM E2 24 h**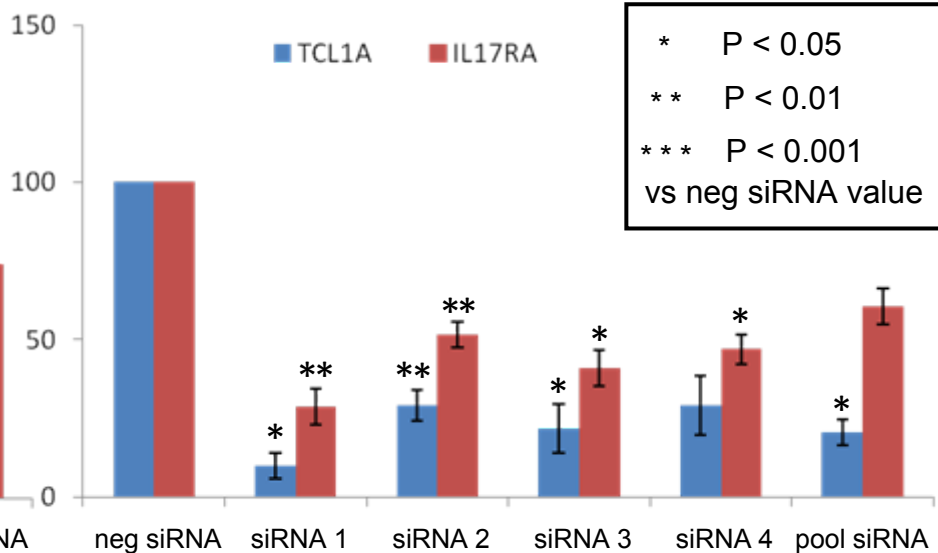

Supplement: MOESM3 [file 9702920]
